# Supplementary material for: Decoding the Distribution of Glycan Receptors for Human-Adapted Influenza A Viruses in Ferret Respiratory Tract
Source: PubMed Central journal article supplement (PMC3281014; doi:10.1371/journal.pone.0027517), 2012-02-16
Supplement: pone.0027517.s001.pdf [file pone.0027517.s001.pdf]

**Table S1** Glycan binding specificities of lectins used in this study

| <i>Lectins</i>                       | <i>Glycan Motifs Recognized</i> |
|--------------------------------------|---------------------------------|
| <b>SNA-I</b>                         |                                 |
| <b>MAL-II</b>                        |                                 |
| <b>Jacalin</b>                       |                                 |
| <b>SNA-I/Jacalin co-staining</b>     |                                 |
| <b>SC18 HA (1918 H1N1 pandemic)</b>  |                                 |
| <b>Alb58 HA (1958 H2N2 pandemic)</b> |                                 |
