# Supplementary material for: Decoding the Distribution of Glycan Receptors for Human-Adapted Influenza A Viruses in Ferret Respiratory Tract
Source: PubMed Central journal article supplement (PMC3281014; doi:10.1371/journal.pone.0027517), 2012-02-16

Ferret Caudal Region  
Jacalin/Alb58 (25X magnification)

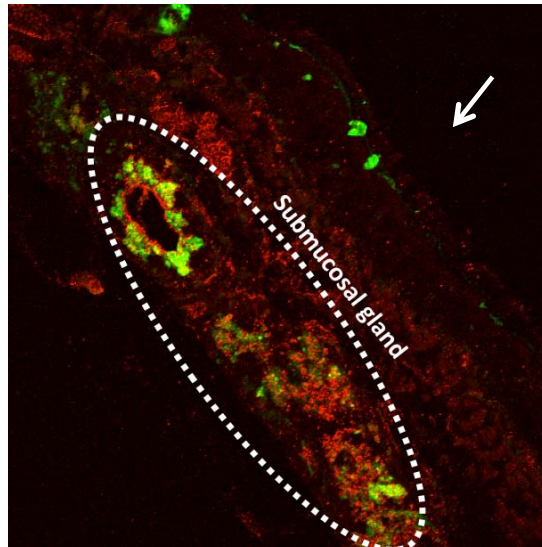

Supplement: pone.0027517.s002.pdf [file pone.0027517.s002.pdf]
