# Supplementary material for: Decoding the Distribution of Glycan Receptors for Human-Adapted Influenza A Viruses in Ferret Respiratory Tract
Source: PubMed Central journal article supplement (PMC3281014; doi:10.1371/journal.pone.0027517), 2012-02-16

**A**

SNA/PI

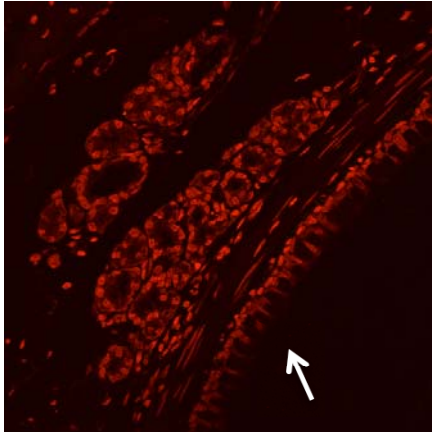

Alb58/PI

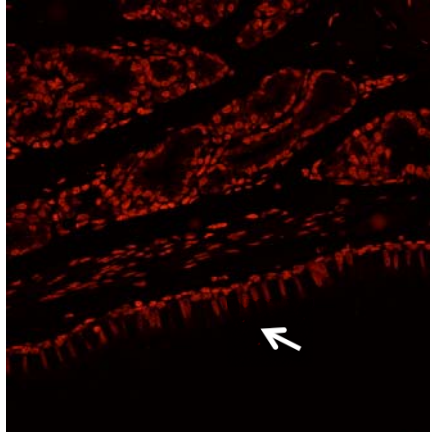

SC18/PI

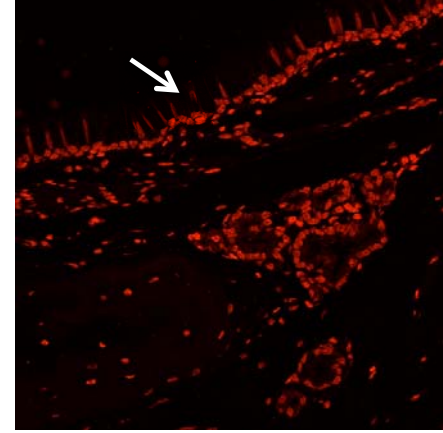

**B**

SNA/PI + *Sialidase A*

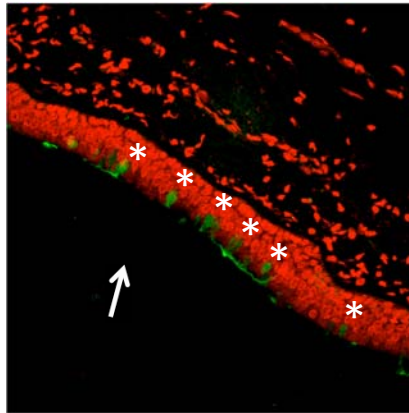

Supplement: pone.0027517.s003.pdf [file pone.0027517.s003.pdf]
